# Supplementary material for: Requirement for interleukin-1 to drive brain inflammation reveals tissue-specific mechanisms of innate immunity
Source: PubMed Central journal article supplement (PMC4357393; doi:10.1002/eji.201444748), 2014-11-24
Supplement: eji0045-0525-sd1.pdf [file eji0045-0525-sd1.pdf]

## Peritoneum

## Lung

## Brain

**A** IL-1 $\alpha$ 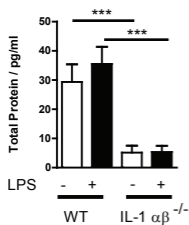IL-1 $\alpha$ 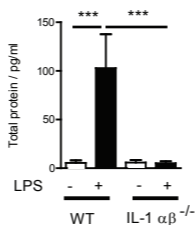IL-1 $\alpha$ 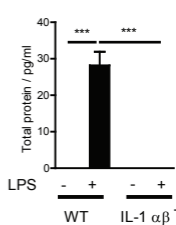**B** IL-1 $\beta$ 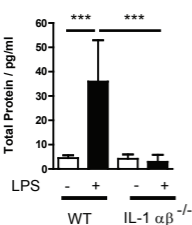IL-1 $\beta$ 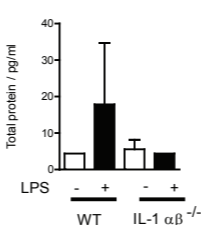IL-1 $\beta$ 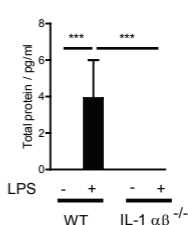**C** IL-6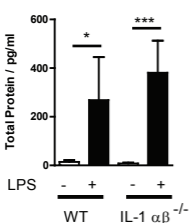

## IL-6

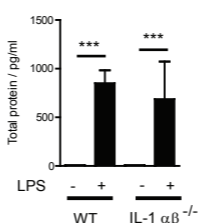

## IL-6

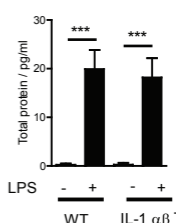**D** CXCL1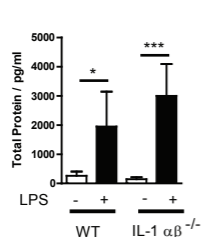

## CXCL1

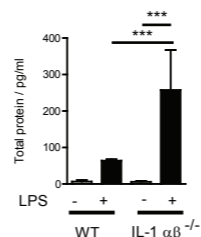

## CXCL1

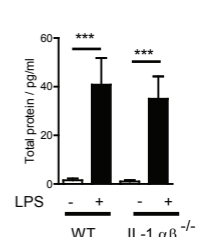**E** CCL5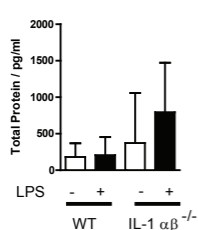

## CCL5

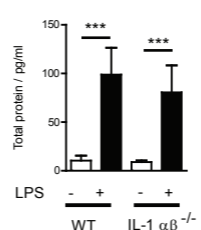

## CCL5

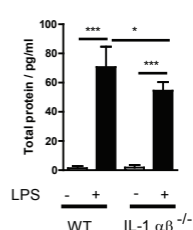**F** TNF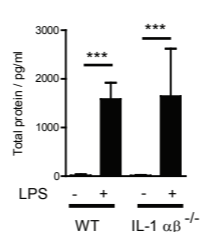

## TNF

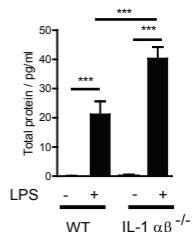

## Supplemental figure 1

Brain dependence on IL-1 is not related to tissue-specific differences in activating IL-1 or established compensatory pathways. A panel of inflammatory cytokines; IL-1 $\alpha$ , IL-1 $\beta$ , IL-6 and TNF and chemokines; CXCL1 and CCL5 were assessed in peritoneum (left column), lung (middle column) and brain (right panel) after injection of LPS. LPS induced a significant increase in the concentration of IL-1 $\alpha$  (**A**) and IL-1 $\beta$  (**B**) in all tissues (with the exception of IL-1 $\alpha$  in the peritoneum). LPS also induced an increase in the majority of mediators across all tissue beds, which was largely unaffected by the absence of IL-1 in IL-1 $\alpha/\beta$ <sup>-/-</sup> mice. \*  $p < 0.05$ , \*\*  $p < 0.01$ , \*\*\*  $p < 0.0001$ ; two-way ANOVA with Bonferroni correction,  $n = 5$ . Data are presented as mean  $\pm$  SD.

**A**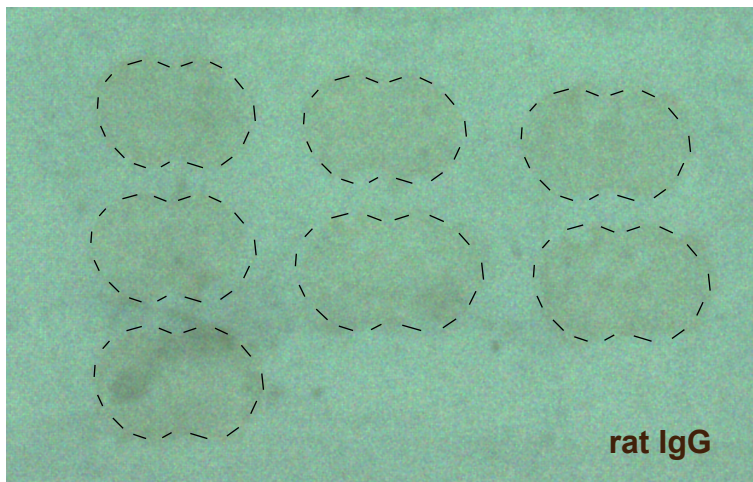**B**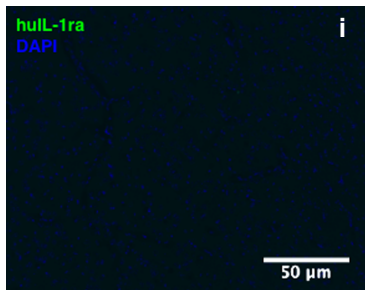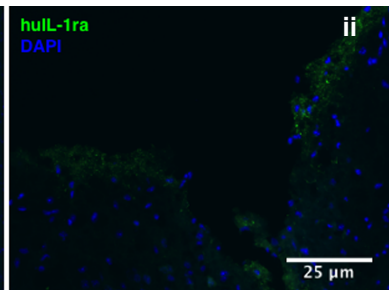

## Supplemental figure 2

Systemically administered IL-1 neutralising antibodies/antagonists do not enter brain parenchyma and provide the capability to selectively target IL-1 produced outside the brain. Representative images confirm lack of penetration of the blood-brain barrier (BBB) by the absence of immunostaining for rat IgG in anti- IL-1 $\alpha$  IgG (i.p) injected mice **(A)**; and the absence of immunostaining for IL-1Ra in the parenchyma of recombinant human-IL-1Ra (hulL-1Ra) (i.p) injected mice **(Bi)**. Right panel **(Bii)** shows hulL-1Ra staining in areas of BBB breakdown at the site of craniectomy.
